# Supplementary material for: Tributylgermanium hydride as a replacement for tributyltin hydride in radical reactionsElectronic supplementary information (ESI) available: full experimental details and data. See http://www.rsc.org/suppdata/ob/b3/b310520b/
Source: Royal Society of Chemistry journal article supplement (doi:10.1039/b310520b), 2004-01-01
Supplement: b310520b.doc [file b310520b.doc]

Supplementary Data

Tributylgermanium Hydride as a Replacement for Tributyltin Hydride in Radical Reactions

W. Russell Bowman,*a Sussie L. Krintela and Mark B. Schillingb *b*

a Department of Chemistry, Loughborough University, Loughborough, Leicestershire, LE1 3TU, UK.

Fax: 44 1509 223925; Tel: 44 1509 222569; E-mail: w.r.bowman@lboro.ac.uk

b Chemical Development, GlaxoSmithKline, Gunnels Wood Road, Stevenage, Herts SG1 2NY, UK. E-mail: mark.b.schilling@gsk.com

2-Iodo-1-(prop-2-enyloxy)benzene 11

Allylbromide (1.1 g, 9.1 mmol) was added to a mixture of 2-iodophenyl (2.0 g, 9.1 mmol) and potassium carbonate (1.3 g, 9.1 mmol) in acetone (8 cm3) and the resulting solution refluxed for 4 h. After cooling to room temperature, water was added to the mixture and extracted into diethyl ether. The organic layer was washed with aqueous sodium hydroxide and brine, dried and evaporated to dryness to give 2-iodo-1-(prop-2-enyloxy)-benzene **1** as an colourless oil (2.2 g, 8.5 mmol, 93%), which did not need further purification. (Found: 259.9698, C9H9IO requires 259.9698); max/cm-1 3062, 3016, 2986, 2918, 2863, 1579, 1473, 1441, 1419, 1275, 1247, 1229, 1123, 1048, 1017 and 748; H (400 MHz) 4.48 (2 H, bs, CH2), 5.25 (1 H, d, *J* 10.8, propenyl 3-H), 5.48 (1 H, d, *J* 17.2, propenyl 3-H), 5.98 (1 H, m, propenyl 2-H), 6.67 (2 H, m, Ar 4,6-H), 7.21 (1 H, m, Ar 5-H) and 7.73 ( 1H, m, Ar 3-H); C (100 MHz) 70.06 (*C*H2), 87.25 (Ar 2-C), 112.87 (propenyl 3-C), 118.05 (Ar 6-C), 123.18 (Ar 4-C), 129.94 (Ar 5-C), 133.07 (propenyl 2-C), 139.96 (Ar 3-C) and 157.53 (Ar 1-C); *m/z* 260 (M+, 100%), 220 (21), 191 (20), 133 (44), 119 (13), 105 (59), 92 (49), 77 (18), 63 (43) and 41 (77).

2-Iodo-1-(prop-2-ynyloxy)benzene 3

Propargylbromide (80 % in toluene, 1.35 g, 9.1 mmol) was added to a solution of 2-iodophenyl (2.0 g, 9.1 mmol) and potassium carbonate (1.3 g, 9.1 mmol) in acetone (8 cm3) and the resulting solution refluxed for 5 h. After cooling to room temperature, water was added to the mixture and extracted into diethyl ether. The organic layer was washed with aqueous sodium hydroxide and brine, dried and evaporated to dryness to give a yellow oil. Column chromatography (light petroleum: EtOAc; 8:1) gave 2-iodo-1-(prop-2-ynyloxy)benzene **3** as a colourless oil (2.2 g, 8.5 mmol, 94%) (Found: 257.9542, C9H7IO requires 257.9542); max(DCM)/cm-1 3290, 1581, 1470, 1447, 1372, 1277, 1225, 1050, 1018 and 645; H (400 MHz) 2.51 (1 H, bs, CH2), 4.71 (2 H, bs, alkyne-H), 6.71 (1 H, m, Ar 6-H), 6.94 (1 H, m, Ar 4-H), 7.26 (1 H, m, Ar 5-H) and 7.74 (1 H, m, Ar 3-H); C 57.39 (*C*H2), 76.72 (alkyne-C), 78.57 (alkyne-C), 87.11 (Ar 2-C), 113.52 (Ar 6-C), 123.94 (Ar 4-C), 129.52 (Ar 5-C), 139.81 (Ar 3-C) and 156.69 (Ar 1-C); *m/z* 258 (M+, 53%), 219 (17), 191 (21), 131 (100), 103 (40), 92 (53), 77 (26) and 63 (38).

1-Bromo-2-(3-phenylprop-2-enyl)oxybenzene 5b2

A mixture of 2-bromophenol (1.00 g, 5.78 mmol), cinnamyl bromide (1.14 g, 5.78 mmol), potassium carbonate (0.80 g, 5.79 mmol) in acetone (4 cm3) was refluxed for 17 h. The mixture was poured into water and extracted with diethyl ether. The combined organic layers were washed with aqueous NaOH solution and with aqueous NaCl solution, dried and evaporated to dryness to give a yellow oil, which was purified by column chromatography (light petroleum:DCM; 7:1) to give 1-bromo-2-(3-phenylprop-2-enyl)oxybenzene **5b** as a colourless oil (1.35 g, 4.65 mmol, 81%) (Found: 288.0155, C15H1379BrO requires: 288.0150); max(DCM)/cm-1 3059, 3025, 1585, 1573, 1478, 1442, 1277, 1244, 1030, 965, 745 and 692; H 4.76 (2 H, dd, *J* 5.6, 1.5, CH2), 6.41 (1 H, dt, *J* 16.0, 5.6, propenyl 2-H) 6.78 (1 H, dd, *J* 16.0, 1.5, propenyl 3-H), 6.81-6.96 (2 H, m, Ph), 7.15-7.45 (6 H, m, Ph) and 7.55 (1 H, dd, *J* 7.9, 1.6, Ph); C 69.8 (*C*H2), 112.5 (Ar 1-C), 114.0 (Ar 3-C), 122.1 (Ar 5-C), 124.0 (propenyl 2-C), 126.7 (Ph 2,6-C), 128.0 (Ph 4-C), 128.4 (propenyl 3-C), 128.6 (Ph 3,5-C), 133.1 (Ar 4-C), 133.5 (Ar 6-C), 136.4 (Ph 1-C) and 155.0 (Ar 2-C); *m/z* 290 (M+, C15H1381BrO, 3 %), 288 (M+, C15H1379BrO, 3%), 145 (6), 143 (6), 117 (100), 115 (76), 91 (41), 86 (26), 84 (40), 77 (11), 63 (7) and 49 (44).

1-Iodo-2(3-phenylprop-2-enyl)oxybenzene 5a

A mixture of cinnamyl bromide (4.48 g, 22.7 mmol), iodophenol (5.0 g, 22.7 mmol) and potassium carbonate (3.14 g, 22.7 mmol) in acetone (16 cm3) was refluxed for 17 h, and thereafter cooled to room temperature. The mixture was poured into water and extracted with diethyl ether. The combined organic layers were washed with aqueous NaOH solution and with aqueous NaCl solution, dried and evaporated to dryness to give a yellow oil, which was purified by column chromatography (light petroleum: DCM; 8:1) to give 1-iodo-2(3-phenylprop-2-enyl)-oxybenzene **5a** as a white solid (5.35 g, 15.91 mmol, 70%) which melts at room temperature. (Found: 336.0012, C15H13IO requires: 336.0011); max(DCM)/cm-1 3058, 3023, 1586, 1571, 1476, 1442, 1276, 1245, 1031, 966, 745 and 692; H 4.77 (2 H, dd, *J* 5.4, 1.6, CH2), 6.41 (1 H, dt, *J* 16.0, 5.4, propenyl 2-H) 6.72 (1 H, dt, *J* 7.8, 1.6, Ph), 6.82 (1 H, d, *J* 16.0, propenyl 3-H), 6.87 (1 H, dd, *J* 8.3, 1.4, Ph), 7.24-7.44 (6 H, m, Ph) and 7.79 (1 H, dd, *J* 7.8, 1.6, Ph); C 70.16 (CH2), 87.3 (Ar 1-C), 113.2 (Ar 3-C), 123.2 (Ar 5-C), 124.4 (propenyl 2-C), 127.0 (Ph 2,6-C), 128.3 (propenyl 3-C), 129.0 (Ph 3,5-C), 129.9 (Ph 4-C), 133.3 (Ar 4-C), 136.9 (Ph 1-C), 140.0 (Ar 6-C) and 157.7 (Ar 2-C); *m/z* 336 (15%), 253 (5), 219 (10), 191 (10), 117 (100), 115 (100), 91 (55) and 64 (20).

(3-Phenylprop-2-enyl)oxy-benzene3

A mixture of phenol (0.49 g, 5.15 mmol), cinnamyl bromide (1.05 g, 5.31 mmol), potassium carbonate (0.73 g, 5.31 mmol) in acetone (5 cm3) was refluxed for 17 h. The mixture was then poured into water and extracted with diethyl ether. The combined organic layers were washed with aqueous NaOH solution and with saturated aqueous NaCl solution, dried and evaporated to dryness to give a yellow oil, which was purified by column chromatography (light petroleum:DCM; 7:1) to give 2-(3-phenylprop-2-enyl)oxybenzene as a white solid (0.225 g, 1.07 mmol, 21%); mp 66-67 C (Lit.3 65-66 C); H 4.70 (2 H, dd, *J* 5.7, 1.4, CH2), 6.42 (1 H, dt, *J* 16.0, 5.7, propenyl 2-H), 6.73 (1 H, d, *J* 16.0, propenyl 3-H), 6.84-6.99 (3 H, m, Ph) and 7.07-7.42 (7 H, m, Ph); C 68.6 (CH2), 114.8 (Ar 2,6-C), 120.9 (Ar 4-C), 124.5 (propenyl 3-C), 126.0 (propenyl 2-C), 126.6 (Ph 2,6-C), 127.8 (Ph 4-C), 128.6 (Ph 3,5-C), 129.5 (Ar 3,5-C), 133.0 (Ph 1-C) and 158.6 (Ar 1-C), *m/z* 210 (M+, 8%), 165 (10), 115 (48), 103 (27), 91 (46), 78 (85), 77 (86), 65 (65), 63 (44), 51 (64) and 39 (100).

*N-*Allyl-2-chloro-*N*-(4-methoxybenzyl)acetamide 9

Potassium carbonate (23.0 g, 0.168 mol) was added to a solution of 4-methoxybenzylamine (7.88 g, 57.4 mmol) in acetonitrile (230 cm3) at 0 ˚C followed by dropwise addition of a solution of allyl bromide (5.79 g, 47.8 mmol) in acetonitrile (46 cm3). The resulting mixture was stirred at room temperature for 17 h, filtered and evaporated to dryness. The resulting oil was dissolved in acetone (230 cm3), potassium carbonate (31.0 g, 0.225 mol) was added at 0 ˚C, followed by dropwise addition of a solution of chloroacetyl chloride (9.78 g, 86.6 mmol) in diethyl ether (46 cm3). The mixture was stirred at room temperature for 17 h, filtered and evaporated to dryness. Column chromato-graphy using light petroleum/EtOAc as eluent gave *N*-allyl-2-chloro-*N*-(4-methoxybenzyl)acetamide **9** as a pale yellow oil (6.92 g, 27.3 mmol, 57 %) (Found: 253.0871, C13H16ClNO2 requires: 253.0870); max(neat)/cm-1 2935, 2836, 1735, 1655, 1612, 1513, 1459 and 739; mixture of conformers: H 3.79 and 3.81 (2 H, 2  s, C*H*2Cl), 3.87 and 3.99 (2 H, 2  d, *J* 5.8, NC*H*2CH=CH2), 4.10 (3 H, s, OMe), 4.52 and 4.54 (2 H, 2  s, NC*H*2Ar), 5.10-5.29 (2 H, m, CH=C*H*2), 5.69-5.84 (1 H, m, C*H*=CH2), 6.85 and 6.89 (2 H, 2  d, *J* 8.7, Ar 3,5-H) and 7.11 and 7.18 (2 H, 2  d, *J* 8.8, Ar 2,6-H); C41.73 (*C*H2Br), 48.51 (N*C*H2CH=CH2), 49.52 and 50.40 (N*C*H2Ar), 55.70 (OMe), 114.44 and 114.81 (Ar 3,5-C), 117.80 and 118.33 (CH=*C*H2), 128.16 (Ar 1-C), 129.11 and 129.99 (Ar 2,6-C), 132.46 and 132.82 (*C*H=CH2), 159.52 and 159.71 (Ar 4-C) and 167.07 and 167.25 (C=O); *m/z* 253 (10%), 212 (75), 176 (20), 161 (18), 136 (40), 121 (100), 115 (20) and 91 (20).

*N*-Allyl-2-bromo-*N*-(4-methoxybenzyl)acetamide 10

Sodium bromide (0.94 g, 9.2 mmol) was added to a solution of *N*-allyl-2-chloro-*N*-(4-methoxybenzyl)acetamide **9** (0.66 g, 2.6 mmol) in freshly distilled acetone (9 cm3) and the mixture refluxed overnight. After cooling to room temperature, acetone was added and the mixture filtered. Addition of diethyl ether, filtration and evaporation of the mixture to dryness gave *N*-allyl-2-bromo-*N*-(4-methoxybenzyl)acetamide **10** (0.57 g, 1.9 mmol, 74 %) as a pale yellow oil which did not require further purification (Found: M+1, 298.0437, C13H17BrNO2 requires: 298.0443); max(neat)/cm-1 2940, 2836, 1651, 1612, 1513, 1455 and 738; mixture of conformers: H 3.78 and 3.81 (3 H, 2  s, OMe), 3.87 (2 H, s, C*H*2Br), 3.88 and 3.98 (2 H, 2  d, *J* 5.8, NC*H*2CH=CH2), 4.53 (2 H, s, NC*H*2Ar), 5.18 (2 H, m, CH=C*H*2), 5.76 (1 H, m, C*H*=CH2), 6.86 (2 H, m, Ar 3,5-H) and 7.11 and 7.17 (2 H, 2  d, *J* 8.6, Ar 2,6-H); C26.4 (*C*H2Br), 48.1 (N*C*H2CH=CH2), 49.6 and 50.6 (N*C*H2Ar), 55.3 and 55.4 (OMe), 114.1 and 114.4 (Ar 3,5-C), 117.4 and 117.8 (CH=*C*H2), 128.8 (Ar 1-C), 129.5 and 129.6 (Ar 2,6-C), 132.4 and 132.5 (*C*H=CH2), 159.1 and 159.3 (Ar 4-C) and 167.0 and 167.2 (C=O); *m/z* 255 (7 %), 253 (10), 214 (20), 212 (60), 136 (65), 121 (100), 91 (20) and 77 (50).

*N*-Allyl-*N*-(4-methoxybenzyl)-2-phenylselanyl-acetamide 11

Sodium borohydride (0.08 g, 2.2 mmol) was at 0 ˚C added to a solution of diphenyl diselanide (0.31 g, 1.0 mmol) in absolute ethanol (180 cm3) and stirred at room temperature for 10 min before a solution of *N*-allyl-2-chloro-*N*-(4-methoxybenzyl)-acetamide **9** (0.5 g, 2.0 mmol) in absolute ethanol (31 cm3) was added dropwise. The mixture was stirred overnight and evaporated to dryness. The resulting oil was added to an aqueous solution of hydrochloric acid (2 M) and extracted into DCM. The combined organic layer was washed with a saturated aqueous solution of NaHCO3 in water and with a saturated aqueous solution of sodium chloride, dried and evaporated to dryness to give *N*-allyl-2-phenylselanyl-*N*-(4-methoxybenzyl)acetamide **11** (0.63 g, 1.7 mmol, 85 %) as a yellow oil which did not require further purification (Found: M+, 375.0748, C19H21BrNO2Se requires: 375.0738); max(DCM)/cm-1 3054, 3001, 2954, 2930, 2834, 1650, 1636, 1621, 1512, 1458, 1440, 1414. 1247, 1175 and 739; mixture of conformers: H 3.71 (2 H, s, C*H*2SePh), 3.79 (3 H, s, OMe), 3.97 and 3.77 (2 H, 2  d, *J* 5.8, NC*H*2CH=CH2), 4.51 and 4.40 (2 H, 2  s, NC*H*2Ar), 5.71 (1 H, m, C*H*=CH2), 5.15 (2 H, m, CH=C*H*2), 6.85 (2 H, m, Ar 3,5-H), 7.15 and 7.06 (2 H, 2  d, *J* 8.6, Ar 2,6-H), 7.26 (3 H, m, Ph 3,4,5-H) and 7.59 (2H, m, Ph 2,6-H); C28.3 (*C*H2SePh), 48.0 (N*C*H2CH=CH2), 50.4 and 49.6 (N*C*H2Ar), 55.3 and 55.2 (OMe), 114.3 and 114.0 (Ar 3,5-C), 117.6 and 117.0 (CH=*C*H2), 127.4 and 127.7 (Ph 2,6-C), 127.8 (Ph 4-C), 128.9 (Ar 1-C), 129.3 and 129.2 (Ph 3,5-C), 129.6 and 129.5 (Ar 2,6-C), 132.64 (Ph 1-C), 133.7 and 133.6 (*C*H=CH2), 159.2 and 159.0 (Ar 4-C) and 169.9 and 169.7 (C=O); *m/z* 375 (M+, 5 %), 314 (5), 218 (100), 176 (25), 157 (30), 136 (80), 121 (100), 105 (15), 91 (100), 77 (96), 65 (32), 55 (100) and 41 (43).

Radical cyclisation of amide precursors

General cyclisation procedure: The radical mediator was added dropwise to a mixture of the radical precursor in anhydrous cyclohexane (*ca*. 0.014 M) at room temperature. The mixture was heated to reflux and AMBN (0.2 equiv.) was added, followed by refluxing for the time indicated under each reaction. If the reaction time was more than 3 h, another small amount of AMBN was added after this period of time. Cooling to room temperature and evaporation of the mixture to dryness gave in most cases oils which were purified by column chromatography.

Radical cyclisation of *N*-allyl-2-chloro-*N*-(4-methoxybenzyl)-acetamide 9

Using the general cyclisation procedure, *N*-allyl-2-chloro-*N*-(4-methoxybenzyl)acetamide **9** (0.15 g, 0.6 mmol) was reacted with Bu3GeH (0.22 g, 0.9 mmol) for 4 h. Column chromatography (light petroleum:EtOAc; 4:11:1) gave 1-(4-methoxybenzyl)-4-methylpyrrolidin-2-one **12** (43.8 mg, 0.2 mmol, 34%) *N*-allyl-*N*-(methoxybenzyl)acetamide **13** (17.0 mg, 0.08 mmol, 13%) and unaltered starting material **45** (37.3 mg, 0.15 mmol, 25%).

**12**:4 H 1.06 (3 H, d, *J* 7.0, Me), 2.06 (1 H, dd, *J* 16.2 and 7.0, 3-H), 2.28-2.48 (1 H, m, 4-H), 2.60 (1 H, dd, *J* 16.2 and 8.3, 3-H), 2.80 (1 H, dd, *J* 9.6 and 5.8, 5-H), 3.34 (1 H, dd, *J* 9.6 and 7.9, 5-H), 3.79 (3 H, s, OMe), 4.37 (2 H, s, NC*H*2Ph), 6.85 (2 H, d, *J* 8.6, Ar 3,5-H), and 7.16 (2 H, d, *J* 8.6, Ar 2,6-H); C 20.10 (Me), 26.60 (4-C), 39.80 (3-C), 46.15 (5-C), 54.08 (N*C*H2Ph), 55.57 (OMe), 114.32 (Ar 3,5-C), 129.21 (Ar 1-C), 129.76 (Ar 2,6-C), 159.12 (Ar 4-C) and 175.29 (2-C); *m/z* 219 (M+, 100%), 176 (35), 146 (32), 121 (91), 91 (28), 78 (47), 77 (44), 55 (32), 42 (82) and 41 (93). **13**, mixture of rotamers: H 2.13 and 2.16 (3 H, 2  s, C(O)Me), 3.79 (3 H, s, OMe), 3.80 and 3.98 (2 H, 2  d, *J* 6.0, NC*H*2CHMe), 4.44 and 4.52 (2 H, 2  s, NC*H*2Ar), 5.06-5.24 (2 H, m, CH=C*H*2), 5.65-5.85 (1 H, m, C*H*=CH2), 6.84 and 6.89 (2 H, 2  d, *J* 8.7, Ar 3,5-H), and.7.10 and 7.18 (2 H, 2  d, *J* 8.7, Ar 2,6-H); C 21.84 and 22.05 (C(O)Me), 47.91 (N*C*H2CHMe), 50.05 and 50.78 (N*C*H2Ar), 55.65 (OMe), 114.68 (Ar 3,5-C), 117.14 and 117.81 (CH=*C*H2), 128.04 (Ar 1-C), 130.02 (Ar 2,6-C), 132.91 and 133.43 (*C*H=CH2), 159.34 (Ar 4-C) and 171.26 (*C*=O); *m/z* 219 (M+, 18%), 178 (32), 136 (76), 121 (39), 91 (13), 78 (21), 77 (19), 55 (32) and 43 (100). The data for **12** and **13** agreed with those reported in the literature. 4

Other reactions with the amide precursors **9**, **10** and **11** are shown in Table 3.

Radical deoxygenation of 1,2:5,6-di-O-isopropylidene-3-O-thiocarbonylimidazole--*D*-glucofuranose 15

1,2:5,6-di-*O*-isopropylidene-3-*O*-thiocarbonylimidazole--*D*-glucofuranose **15** (190 mg, 0.5 mmol) in anhydrous toluene (5 cm3) was added dropwise to a refluxing solution of Bu3GeH (0.66 g, 2.7 mmol) in anhydrous toluene (5 cm3) and the mixture was refluxed for 90 min. Cooling to room temperature and evaporation to dryness followed by column chromatography (light petroleum:EtOAc; 3:1) gave 3-deoxy-1,2:5,6-di-*O*-iso-propylidene--*D*-glucofuranose **17**5,6 **(**110 mg, 0.4 mmol, 87 %); H 1.27 (3 H, s, Me), 1.31 (3 H, s, Me), 1.37 (3 H, s, Me), 1.46 (3 H, s, Me), 1.66-1.77 (1 H, m, 3-H), 2.14 (1 H, dd, *J* 13.0 and 3.5, 3-H), 3.73-3.81 (1 H, m, 5-H), 4.02-4.15 (3 H, m, 4,6-H), 4.71 (1 H, dd, *J* 3.7 and 3.7, 2-H) and 5.76 (1 H, d, *J* 3.7, 1-H); C 25.5 (Me), 26.3 (Me), 26.8 (Me), 27.1 (Me), 35.6 (3-C), 67.5 (6-C), 77.1 (2-C), 79.0 (5-C), 80.8 (4-C), 106.0 (1-C), 109.9 (Cq), and 111.6 (Cq); *m/z* 245 (2 %), 229 (60), 171 (8), 143 (60), 111 (65), 101 (48), 85 (70), 83 (50), 59 (75), 54 (90) and 43 (100). The spectroscopic data for **17**5,6 was identical to data reported in the literature.

The reaction was repeated using Bu3SnH in place of Bu3GeH to yield 3-deoxy-1,2:5,6-di-*O*-isopropylidene--*D*-glucofuranose **17**5,6 **(**29%) and 1,2:5,6-di-*O*-isopropylidene-3-*O*-methyl--*D*-glucofuranose **18**7 (28%). The yields were determined using 1H-NMR spectroscopy with 1,4-dinitrobenzene as the internal standard in. **18**: H 1.29 (3 H, s, Me), 1.33 (3 H, s, Me), 1.40 (3 H, s, Me), 1.48 (3 H, s, Me), 3.42 (3 H, s, OMe), 3.74 (1 H, d, *J* 3.0, 3-H), 3.97 (1 H, dd, *J* 8.80 and 5.78, 6-H), 4.02-4.18 (2 H, m, 4,6-H), 4.27 (1 H, dt, *J* 7.88 and 5.78, 5-H), 4.54 (1 H, d, *J* 3.9, 2-H) and.5.83 (1 H, d, *J* 3.7, 1-H); C 25.27 (Me), 26.63 (Me), 26.88 (Me), 26.99 (Me), 58.19 (OMe), 66.97 (4-C), 72.45 (6-C), 80.89 (3-C), 81.50 (5-C), 83.56 (2-C), 105,16 (Cq), 109.22 (1-C) and 111.59 (Cq). The spectroscopic data for **18**7 was identical to data reported in the literature.

Radical deoxygenation of thiocarbonylimidazolide of cholesterol 20

A solution of the thiocarbonylimidazolidesof cholesterol **20** (0.1 g, 0.2 mmol) in anhydrous toluene (5 cm3) was added dropwise to a refluxing solution of Bu3GeH (100 mg, 0.4 mmol) in anhydrous toluene (4 cm3) and the mixture refluxed for 3 h. ACCN (0.12 g, 0.5 mmol in total) was added initially and then every 45 min. Cooling to room temperature, evaporation of solvent, column chromatography (light petroleum on alumina), followed by recrystallisation from EtOH gave cholest-5-ene **21** (Z = H) as a white solid (50 mg, 0.14 mmol, 67%); mp 87-89 ˚C (lit.8 88-89 C) (Found: C: 87.56, H: 12.48, C27H46 requires C: 87.49, H: 12.51); H (400 MHz) 0.68 (3 H, s, Me), 0.86 (3 H, d, *J* 6.8, Me), 0.87 (3 H, d, *J* 6.4, Me), 0.92 (3 H, d, *J* 6.4, Me), 1.00 (3 H, s, Me), 0.98-2.02 (29 H, m), 2.23 (2 H, m, HB) and 5.27 (1 H, t, *J* 2.0, C=C*H*); C 11.89 (CH or CH3), 18.74 (CH or CH3), 19.48 (CH or CH3), 20.79 (CH2), 22.58 (CH or CH3), 22.59 (CH2), 22.83 (CH or CH3), 23.86 (CH2), 24.30 (CH2), 28.03 (CH or CH3), 28.09 (CH2), 28.27 (CH2), 31.87 (CH or CH3), 31.91 (CH2), 32.92 (CH2), 35.82 (CH or CH3), 36.23 (CH2), 37.56 (Cq), 39.55 (CH2), 39.90 (CH2), 42.33 (Cq), 50.63 (CH or CH3), 56.20 (CH or CH3), 56.91 (CH or CH3), 118.99 (C=*C*H) and 143.74 (*C*=CH).

Other results are reported in the text.

Cyclisation of 4-phenyl-1-(3-phenylselanylpropyl)-1*H*-pyrazole 27 (n = 1)

A solution of Bu3GeH (85 mg, 0.3 mmol) and ACCN (0.2 g, 0.6 mmol) in anhydrous toluene (50 cm3) was added by syringe pump to a refluxing solution of 4-phenyl-1-(3-phenylselanyl-propyl)-1*H*-pyrazole **27** (n = 1) (0.1 g, 0.3 mmol) in anhydrous toluene (200 cm3) was over 6 h. The reaction mixture was refluxed for further 30 min after complete addition, cooled to room temperature and evaporated to dryness. Column chromatography (light petroleum/EtOAc:5:1)gave a mixture of unreacted starting material **27** (n = 1) (47%), 4-phenyl-1-propyl-1*H*-pyrazole **29** (n = 1) (19%) and 1-allyl-4-phenyl-1*H*-pyrazole **30** (n = 1) (7%). All yields were determined by the use of 1,4-dimethoxybenzene as the internal standard in 1H-NMR spectroscopy. **29** (n = 1)42 (Found: M+, 186.1154. C12H14N2 requires 186.1157); max/cm-1 3131; H 0.95 (3 H, t, *J* 7.4, Me), 1.89-1.98 (2 H, m, 2-H), 4.11 (2 H, t, *J* 7.2, 1-H), 7.19-7.25 (1 H, m, Ph 4-H), 7.34-7.38 (2 H, m, Ph 3,5-H), 7.47-7.49 (2 H, m, Ph 2,6-H), 7.63 (1 H, s, pyrazole 3-H) and 7.78 (1 H, s, pyrazole 5-H); C 11.14 (3-C), 23.71 (2-C), 54.03 (1-C), 122.65 (pyrazole 4-C), 125.44 (Ph 2,6-C), 125.89 (pyrazole 3-C), 126.23 (Ph 4-C), 128.79 (Ph 3,5-C), 132.75 (Ph 1-C) and 136.54 (pyrazole 5-C); *m/z* 186 (M+, 87 %), 157 (100) and 144 (64). **30** (n = 1)42 H 4.66-4.75 (2 H, m, 1-H), 5.20-5.29 (2 H, m, CH=C*H*2), 5.95-6.11 (1 H, m, C*H*=CH2), 7.51-7.17 (5 H, m, Ph), 7.62 (1 H, s, pyrazole 3-H) and 7.79 (1 H, s, pyrazole 5-H); *m/z* 184 (M+, 44 %), 183 (55), 157 (19), 156 (16), 143 (22), 102 (18), 89 (27), 77 (10), 63 (31), 41 (66) and 39 (100).

Other results for pyrazoles are reported in the text for the cyclisations of **27** (n = 1 and 2).

Radical cyclisation of 1-(4-phenylselanylbutyl)-1H-pyrrole-2-carbaldehyde 23

Following the general procedure for syringe-pump addition of the radical mediator, 1-(4-phenylselanylbutyl)-1*H*-pyrrole-2-carbaldehyde **23** (0.36 g, 1.0 mmol) in acetonitrile (70 cm3) was reacted with Bu3SnH (1.2 equiv.) in toluene and AMBN (excess) for 3 h. A small amount of AMBN was added every hour. The reaction mixture was cooled and evaporated to dryness. Column chromatography using mixtures of light petroleum and EtOAc gave 5,6,7,8-tetrahydro-indolizine-3-carbaldehyde **26** (62%) and unreacted starting material **23** (29 %). The data were identical to authentic materials. 41 In an identical reaction but with Bu3GeH (1.5 equiv.) in place of Bu3SnH, yields of **26** (21%) and unreacted starting material **23** (69%) were obtained.

3-(1*H*-Indol-3-yl)propionic acid Se-phenyl ester 31

Tri-*n*-butylphosphine (4.79 cm3, 19.22 mmol) was added dropwise to a solution of 3-(1*H*-indol-3-yl)-propionic acid (2.42 g, 12.81 mmol) and diphenyl diselanide (6.00 g, 19.22 mmol) in anhydrous DCM (30 cm3) at 0 ˚C, and the resulting mixture stirred at ambient temperature for 4 h. The reaction was added to water, extracted into DCM, dried, filtered though a pad of celite and evaporated to dryness. Column chromatography with light petroleum:Et2O as eluant gave 3-(1*H*-indol-3-yl)-seleno-propionic acid Se-phenyl ester (4.13 g, 12.58 mmol, 98 %) as a yellow oil (Found: 329.0319, C17H15SeNO requires 329.0319); max/cm-1 3419, 3055, 2908, 2580, 1882, 1717, 1619, 1577, 1476, 1459, 1438, 1339, 1020, 738, and 689; H (400 MHz) 3.04-3.08 (2 H, m, 2-H), 3.11-3.15 (2 H, m, 3-H), 6.88 ( 1 H, d, *J* 2.4, Ar 2-H), 7.11 (1 H, m, Ar 6-H), 7.17 (1 H, m, Ar 7-H), 7.27 (1 H, d, *J* 7.2, Ar 5-H), 7.33-7.35 (3 H, m, Ph 2,4,6-H), 7.46-7.49 (2 H, Ph 3,5-C), 7.54 (1 H, d, *J* 8.0, Ar 8-H) and 7.89 (1 H, bs, NH); C 21.44 (2-C), 48.33 (3-C), 111.75 (Ar 8-C), 114.35 (Ar 3-C), 119.04 (Ar 7-C), 119.86 (Ar 5-C), 122.27 (Ar 6-C), 122.56 (Ar 2-C), 126.92 (Ar 4-C), 127.46 (Ph 1-C), 129.36 (Ph 4-C), 129.84 (Ph 3,5-C), 136.28 (Ph 2,6-C), 136.71 (Ar 9-C) and 200.87 (C=O); *m/z* 329 (M+, 36 %), 314 (10), 172 (100), 157 (43), 144 (100), 130 (100), 115 (61), 103 (26), 89 (24), 77 (75), 63 (14) and 51 (29).

Radical decarbonylation of 3-(1*H*-indol-3-yl)propionic acid *Se-*phenyl ester 31

Bu3GeH (94.9 mg, 0.39 mmol) was added to a solution of 3-(1*H*-indol-3-yl)-seleno-propionic acid Se-phenyl ester **31** (0.12 g, 0.37 mmol) in anhydrous toluene (30 cm3) and the mixture heated to reflux. ACCN (0.15 g, 0.91 mmol in total) was added initially and then in small portions every 45 min. After heating under reflux for 2 h, the mixture was cooled to room temperature and evaporated to dryness. Use of 1,4-dimethoxybenzene as the internal standard in 1H-NMR spectroscopy revealed the formation of decarbonylated product 3-ethyl-1*H*-indole **35** (63%). Column chromatography using mixtures of light petroleum and EtOAc as eluant gave **35** as a colourless oil (Found: 145.0890, C10H11N requires 145.0892); max(DCM)/cm-1 3414, 3056, 2963, 2829, 1702, 1682, 1604, 1455, 1421, 1339, 1223, 1093 and 741; H 1.33 (3 H, t, *J* 7.5, CH3), 2.79 (2 H, q, *J* 7.5, CH2), 6.94 (1 H, m, Ar 2-H), 7.07-7.22 (2 H, m, Ar 6,7-H), 7.33 (1 H, d, *J* 7.6, Ar 8-H), 7.61 (1 H, d, *J* 7.6, Ar 5-H) and 7.84 (1 H, bs, NH); C 14.44 (CH3), 17.29 (CH2), 111.01 (Ar 8-C), 118.80 (Ar 3-C), 118.93 (Ar 7-C), 119.03 (Ar 5-C), 120.41 (Ar 6-C), 121.86 (Ar 2-C), 130.20 (Ar 4-C) and 136.37 (Ar 9-C); *m/z* 145 (78 %), 130 (100) and 77 (21).

The comparative reaction using Bu3SnH was carried out under the same conditions except that AIBN was used in place of ACCN.

Radical cyclisation of 3-nitro-3-methyl-4-phenyl-4-(prop-2-ynyloxy)butyl cyanide 36

Bu3HeH (0.10 g, 0.4 mmol) was added dropwise to a solution of 3-nitro-3-methyl-4-phenyl-4-(prop-2-ynyloxy)butyl cyanide **79** (90 mg, 0.3 mmol) in anhydrous acetonitrile (2 cm3) and the mixture heated at reflux for 3 h. AIBN (40 mg, 0.2 mmol in total) was added initially and then in portions every hour. After cooling to room temperature, the solution was evaporated to dryness and the crude reaction mixture purified by column chromatography using light petroleum and EtOAc as eluants to give 3-(3-methyl-4-methylene-2-phenyl-tetrahydro-furan-3-yl)propionitrile as two diastereoisomers, **38** (18%) and **39 (**21%) respectively, and unaltered starting material **36** (51%). Due to by-products, the yields were determined by the use of 1,4-dimethoxybenzene as the internal standard in 1H-NMR spectroscopy. **38**:45 H(400 MHz) 0.64 (3 H, s, Me), 1.88 (2 H, m, NCCH2C*H*2), 2.38 (2 H, dd, *J* 7.6 and 8.4, NCC*H*2), 4.40 (1 H, dt, *J* 2.4 and 13.6, OC*H*2), 4.62-4.66 (2 H, m, PhC*H* and OC*H*2), 4.80 (1 H, t, *J* 2.4, C=C*H*), 5.05 (1 H, t, *J* 2.0, C=C*H*) and 7.16-7.29 (5 H, m, Ph); C 12.99 (NC*C*H2), 22.79 (Me), 33.42 (NCCH2*C*H2), 48.85 (*C*CH3), 71.43 (C=*C*H2), 87.50 (Ph*C*), 105.40 (C=*C*H2), 120.33 (CN), 126.99 (Ph C-2,5), 128.61 (Ph C-4), 128.69 (Ph C-2,6), 138.92 (Ph C-1) and 153.45 (*C*=CH2); *m/z* 227 (5%), 128 (8), 120 (12), 107 (100), 79 (85), 53 (30) and 41 (35). **39**:45 H(400 MHz) 1.11 (3 H, s, Me), 1.88 (2 H, m, NCCH2C*H*2), 2.38 (2 H, dd, *J* 7.6 and 8.4, NCC*H*2), 4.39 (1 H, dt, *J* 2.4 and 13.6, OC*H*2), 4.90 (1 H, s, PhC*H*), 4.59 (1 H, dt, *J* 2.0 and 13.6, OC*H*2), 4.84 (1 H, t, *J* 2.4, C=C*H*), 5.05 (1 H, t, *J* 2.0, C=C*H*) and 7.25-7.30 (5 H, m, Ph); C 12.63 (NC*C*H2), 23.78 (Me), 30.03 (NCCH2*C*H2), 48.37 (*C*CH3), 70.34 (=*C*H2), 89.86 (Ph*C*), 106.42 (C=*C*H2), 120.61 (CN), 126.65 (Ph C-2,5), 128.86 (Ph C-4), 128.97 (Ph C-2,6), 137.02 (Ph C-1) and 153.39 (*C*=CH2); *m/z* 227 (5%), 128 (8), 120 (12), 107 (100), 79 (85), 53 (30) and 41 (35). The data for both isomers corresponded with that reported in the literature.45 Other reactions are detailed in Scheme 7.

2-Allyl-2-(2-bromoallyl)malonic acid dimethyl ester 40

A solution of sodium (0.50 g, 21.5 mmol) in MeOH (10 ml) was added dropwise to a solution of dimethyl allylmalonate (3.0 g, 17.42 mmol) in MeOH (40 cm3) and the mixture stirred for 10 min. 2,3-Dibromopropene (4.20 g, 21.0 mmol) was added dropwise and the resulting mixture stirred at ambient temperature for 20 h. The reaction was quenched by water and extracted into DCM. Drying and evaporation to dryness gave the crude product which was purified by column chromatography using light petroleum and EtOAc as eluent to give 2-allyl-2-(2-bromo-allyl)malonic acid dimethyl ester **40** (2.73 g, 9.4 mmol, 54 %) as a colourless oil (Found: (M-H)+, 289.0080, C11H1479BrO4 requires 289.0026); H(400 MHz) 2.77 (2 H, d, *J* 7.6, C*H*2CH=CH2), 3.15 (2 H, s, C*H*2C(Br)=CH2), 3.74 (6 H, s, Me), 5.11-5.15 (2 H, m, CH2CH=C*H*2) and 5.60-5.69 (3 H, m, CH2C*H*=CH2 and CH2C(Br)=C*H*2); C 36.16 (*C*H2CH=CH2), 43.12 (*C*H2C(Br)=CH2), 52.68 (Me), 57.04 (*C*-CO2Me), 119.67 (CH2C(Br)=*C*H2), 122.21 (CH2CH=*C*H2), 127.00 (CH2*C*(Br)=CH2), 132.05 (CH2*C*H=CH2) and 170.54 (C=O); m/z 291 (M+, 81Br, 6%), 289 (M+, 79Br, 7%), 271 (6), 269 (7), 211 (100), 199 (8), 171 (7), 151 (42), 139 (25), 91 (68), 77 (26), 59 (37) and 41 (23).

Radical cyclisation of 2-allyl-2-(2-bromoallyl)malonic acid dimethyl ester 40

Bu3SnH (0.10 g, 0.35 mmol) was added to a solution of 2-allyl-2-(2-bromoallyl)malonic acid dimethyl ester **40** (92.0 mg, 0.32 mmol) in anhydrous toluene (18 cm3) and the mixture heated to reflux. AMBN (30.0 mg, 0.16 mmol in total) was added initially and then in small portions every 45 min. After refluxing for 4 h, the mixture was cooled to ambient temperature and evaporated to dryness. Column chromatography (light petroleum:EtOAc; 19:1) gave a mixture of isomeric products (58.7 mg, 0.28 mmol, 88 % in total), 3-methyl-4-methylene-cyclopentane-1,1-di-carboxylic acid dimethyl ester **45** (57%) and 3-methylene-cyclohexane-1,1-dicarboxylic acid dimethyl ester **46** (31%). **45**: H 1.11 (3 H, d, *J* 6.0, Me), 1.76-1.80 (2 H, m, 2-H), 2.55-2.59 (1 H, m, 3-H), 2.92-297 (1 H, m, 5-H), 3.04-3.08 (1 H, m, 5-H), 3.72 (3 H, s, CO2Me), 3.73 (3 H, s, CO2Me), 4.81 (1 H, s, C=C*H*) and 4.91 (1 H, s, C=C*H*); C 18.33 (Me), 37.65 (3-C), 40.97 (2-C), 42.61 (5-C), 53.12 (CO2*Me*), 53.17 (CO2*Me*), 58.51 (1-C), 105.98 (=*C*H2), 144.42 (4-C), 172.71 (C=O) and 172.84 (C=O); *m/z* 212 (M+, 3%), 181 (8), 180 (6), 153 (9), 152 (78), 121 (17), 93 (100), 91 (26) and 77 (23). **46**: H 1.63-1.76 (2 H, m, 5-H), 2.04-2.14 (4 H, m, 4,6-H), 2.68 (2 H, s, 2-C), 3.72 (3 H, s, CO2Me) and 4.74 (2 H, s, C=C*H*2); C 24.57 (5-C), 31.55 (4-C), 34.25 (6-C), 40.05 (2-C), 52.93 (CO2*Me*), 57.13 (1-C), 111.06 (C=*C*H2), 153.53 (3-C) and 172.03 (C=O); *m/z* 212 (M+, 6%), 181 (4), 180 (10), 153 (15), 152 (80), 121 (21), 93 (100), 91 (34) and 77 (21). The spectroscopic data were in agreement with those in the literature.9

The reactions with Bu3GeH were analysed by TLC, GCMS and 1H NMR spectroscopy with 1,4-dimethoxybenzene as the internal standard. The amounts of the Bu3Ge-addition compounds was not determined..

References

Some reference numbers refer to the published paper.

1 M. Uchiyama, M. Kanuda, O. Mishima and N. Yokoyama, *J. Am. Chem. Soc.*, 1998, **20**, 4945.

2 C. J. Moody, K. J. Doyle, M. C. Elliott and T. J. Mowlem, *J. Chem. Soc., Perkin Trans. 1*, 1997, 2413.

3 E. Keinan, M. Sahai, Z. Roth, A. Nudelman and J. Herzig, *J. Org. Chem.*, 1985, **50**, 3558.

4 B. C. Gilbert, W. Kalz, C. I. Lindsay, P. T. McGrail, A. F. Parsons and D. T. E. Whittaker, *J. Chem. Soc., Perkin Trans. 1*, 2000, 1187.

5 D. H. R. Barton and S. W. McCombie, *J. Chem. Soc., Perkin Trans. I*, 1975, 1574.

6 S. J. Cole, J. N. Kirwan, B. P. Roberts and C. R. Willis, *J. Chem. Soc., Perkin Trans. 1*, 1991, 103.

7 H.-S. Dang, B. P. Roberts and D. A. Tocher, *J. Chem. Soc., Perkin Trans. 1*, 2001, 2452.

8 H. Hagiwara, S. Ohtsubo and M. Kato, *Tetrahedron*, **1997**, *53*, 2415.

9 S. Ozaki, I. Horiguchi, H. Matsushita and H. Ohmori, *Tetrahedron Lett.*, **1994**, *35*, 725.
